# Supplementary material for: A regulatory role for the cohesin loader NIPBL in nonhomologous end joining during immunoglobulin class switch recombination
Source: PubMed Central journal article supplement — J Exp Med. 2013 Nov 18;210(12):2503–13. doi: 10.1084/jem.20130168 (PMC3832922; doi:10.1084/jem.20130168), 2013-11-18
Supplement: supp_jem.20130168_JEM_20130168_sm.pdf [file supp_jem.20130168_JEM_20130168_sm.pdf]

SUPPLEMENTAL MATERIAL

Enverald et al., <http://www.jem.org/cgi/content/full/jem.20130168/DC1>

**MAT $\alpha$  (genomic sequence, before DSB)**

**HO DSB**

GGACAAAATGCAGCACGGAATATGGGACTACTTCGCGCAACA|GTATAATTTTATAAC  
 CCTGTTTTACGTCGTGCCTTATACCTGATGAAGCGCGTTGT|CATATTTAAAATATTG

Wt 1:1 AAATGCAGCACGGAATATGGGACTACTTCGCGCA-CA--GTATAATTTTA -A  
 Wt 2:5 AAATGCAGCACGGAATATGGGACTACTTCGCGCAACACAGTATAATTTTA +CA  
 Wt 1:12 AAATGCAGCACGGAATATGGGACTACTTCGCGCAAAACAGTATAATTTTA +CA  
 Wt 2:6 AAATGCAGCACGGAATATGGGACTACTTCGCGCAACACAGTATAATTTTA +CA  
 Wt 2:8 AAATGCAGCACGGAATATGGGACTACTTCGCGCAACACAGTATAATTTTA +CA  
 Wt 1:11 AAATGCAGCACGGAATATGGGACTACTTCGCGCA- - - -GTATAATTTTA -ACA  
 wt 1:7 AAATGCAGCACGGAATATGGGACTACTTCGCGCAACA--GTATAATTTTA -

MAT $\alpha$  AAATGCAGCACGGAATATGGGACTACTTCGCGCAACA--GTATAATTTTA  
 \*\*\*\*\*

lig4 1:5 AAATGCAGCACGGAATATGGGACTACTTCGCGCAACA--GTATAATTTTA -  
 lig4 2:4 AAATGCAGCACGGAATATGGGACTACTTCGCGCAACA--GTATAATTTTA -  
 lig4 1:6 AAATGCAGCACGGAATATGGGACTACTTCGCGCAACA--GTATAATTTTA -  
 lig4 1:7 AAATGCAGCACGGAATATGGGACTACTTCGCGCAACA--GTATAATTTTA -  
 lig4 2:5 AAATGCAGCACGGAATATGGGACTACTTCGCGCAACA--GTATAATTTTA -  
 lig4 1:4 AAATGCAGCACGGAATATGGGACTACTTCGCGCAACA--GTATAATTTTA -

MAT $\alpha$  AAATGCAGCACGGAATATGGGACTACTTCGCGCAACA--GTATAATTTTA  
 \*\*\*\*\*

scc2 1:8 AAATGCAGCACGGAATATGGGACTACTTCGCGCAACA--GTATAATTTTA -  
 scc2 2:1 AAATGCAGCACGGAATATGGGACTACTTCGCGCAACA--GTATAATTTTA -  
 scc2 1:9 AAATGCAGCACGGAATATGGGACTACTTCGCGCAACA--GTATAATTTTA -  
 scc2 1:12 AAATGCAGCACGGAATATGGGACTACTTCGCGCAACA--GTATAATTTTA -  
 scc2 1:1 AAATGCAGCACGGAATATGGGACTACTTCGCGCAACA--GTATAATTTTA -  
 scc2 2:4 AAATGCAGCACGGAATATGGGACTACTTCGCGCAACACA-GTATAATTTTA +CA  
 scc2 2:4 AAATGCAGCACGGAATATGGGACTACTTCGCGCAACAACAGTATAATTTTA +ACA  
 scc2 1:10 AAATGCAGCACGGAATATGGGACTACTTCGCGCAACA--GTATAATTTTA -

MAT $\alpha$  AAATGCAGCACGGAATATGGGACTACTTCGCGCAACA--GTATAATTTTA  
 \*\*\*\*\*

|                         | WT   | <i>scc2-4</i> | <i>lig4<math>\Delta</math></i> | Reference<br>(Moore et al,1996) |
|-------------------------|------|---------------|--------------------------------|---------------------------------|
| - (no change, germline) | 4/18 | 14/17         | 13/13                          |                                 |
| -ACA                    | 3/18 | 0/17          | 0/13                           | 5/45                            |
| -A                      | 2/18 | 0/17          | 0/13                           | 1/45                            |
| +CA                     | 9/18 | 2/17          | 0/13                           | 35/45                           |
| +ACA                    | 0/18 | 1/17          | 0/13                           | 1/45                            |

**Figure S1. Sequencing of yeast HO DSB joints.** WT, *scc2*-deficient (*scc2-4*), or *lig4*-deleted (*lig4 $\Delta$* ) cells were arrested in G1. A site-specific DSB was induced at restrictive temperature. Surviving cells forming single colonies were picked and allowed to propagate to get sufficient amounts of cells for preparation of genomic DNA. A 600-bp region encompassing the site-specific HO DSB was subsequently PCR amplified and sequenced. The sequences were then aligned to the germline MAT $\alpha$  sequence. Six representative sequences are shown for each strain. A summary of sequenced clones is shown in the table. -ACA or -A, deletion of ACA or A nucleotide(s) at the break site; +CA and +ACA, insertion of CA or ACA nucleotides at the break site.





271  
 Sμ CTGGGTTGAGCTGAGCTGAGCTGAGCTGGGCTAAAGTTGCACCAGGTGAGC  
 P2-11a CTGGGTTGAGCTGAGCTGAGCTGAGCTGGGCTGGGCTGGACTGAGCTGGA  
 Sa1 CTGAGCTGGACTGGCTGGCTGAGCTGGGCTGGGCTGGACTGAGCTGGA  
 13 bp OL  
 2481 (16/17 bp) OL

244  
 Sμ AGCTGAACTGGGCTGAGTTGAACTGGGCTGAGCTGAGCTGAGCTGAGCTG  
 P3-8a AGCTGAACTGGGCTGAGTTGAACTGGGCTGAGCTGGGCTGGGCTGGACTG  
 Sa2 CCCTGGGGTGGGCTGGGCTGAGCTGGGCTGAGCTGGGCTGGGCTGGACTG  
 5 bp OL  
 2523 (9/10 bp) OL

372  
 Sμ GCTGAGCTGAGCTGGGCTGGGCTGAGCTGGGCTGGGCTGGGCTGA  
 P2-12a GCTGAGTTGAGCTGGGCTGGGCTGAGCTGGGCTGGGCTGGGCTGG  
 Sa1 GCTGAGCTGGCTGGGCTGGGCTGAGCTGGGCTGGGCTGGGCTGG  
 9 bp OL  
 2502 (19/20 bp) OL

249  
 Sμ TGGGCTGAGTTGAACTGGGTTGAGCTGAGCTGAGCTGAGCTGGGCTAAGT  
 P3-8b TGGGCTGAGTTGAACTGGGCTGAGCTGGGCTGGGCTGGATGAGCTGAGGT  
 Sa2 TGGACTGAGCTGGACTGGCCTGGGCTGGGCTGGGCTGGATGAGCTGAGGT  
 1 bp Insertion  
 2579 (2/3 bp) OL

346  
 Sμ AAGCTGGGCTGAGCTGGGCTGGGCTGGGCTGAGCTGAGCTGGGCTGGGCT  
 P2-14a AAGCTGGGCTGAGCTGGGCTGGGCTGGGCTGGGCTGAGCTGGGCTGGGCT  
 Sa1 GGACTGGCCTGGGCTGAGCTGGGCTGGGCTGGGCTGAGCTGGGCTGGGCT  
 11 bp OL  
 2489 (13/14 bp) OL

232  
 Sμ GGGCTGAGCTGAGCTGAACTGGGCTGAGTTGAACTGGGTTGAGCTGAGCT  
 P3-10a GGGCTGAGCTGAGCTGGGCTGAGCTGGGCTGGGCTGGGCTGGGCTGGATG  
 Sa2 GGACTGAGCTGGACTGAGCTGGGCTGGGCTGGGCTGGGCTGGGCTGGATG  
 3 bp OL  
 2568 (3/4 bp) OL

603  
 Sμ TGGGCTGAGCTGGGCTAGGCTGGGCTGAGCTGGGCTGAGCTAGGCTGGGCT  
 P3-2a TGGGCTGAGCTGGGCTAGGCTGGGCTGAGCTGGGCTGCTAATGTGGGAAAG  
 Sa1 CTGGGCTGGGCTGGGCTGGGCTGGGCTGAGCTGGGCTGCTAATGTGGGAAAG  
 9 bp OL  
 2537 (12/13 bp) OL

309  
 Sμ GGTGAGCTGAGCTGAGCTGGGCTGGGCTGACTAAGCTGGGCTGAGCTGGG  
 P3-11 GGTGAGCTGAGCTGAGCTGGGCTGGGCTGGGCTGGGCTGAGCTGGGCTG  
 Sa1 GGCTGACCTGTGCTGGGCTGGGCTGGGCTGGGCTGGGCTGAGCTGGGCTG  
 3 bp OL  
 1924 (3/4 bp) OL

397  
 Sμ GGGCTGGGCTGGGCTGGGCTGGGCTGGGCTGGGCTGGGCTGGGCTGGGCT  
 P3-4a GGGCTGGGCTGGGCTGGGCTGGGCTGGGCTGGGCTGGGCTGGGCTGGGCT  
 Sa1 GGACTGGCTGGGCTGGGCTGGGCTGGGCTGGGCTGGGCTGGGCTGGGCTGGGCT  
 5 bp OL  
 2531 (18/19 bp) OL

434  
 Sμ CGGGGCTGAGCTGAGCTGGGCTGGGCTGGGCTGGGCTGGGCTGGGCTGGGCT  
 P3-13 CGGGGCTGAGCTGAGCTGGGCTGGGCTGGGCTGGGCTGGGCTGGGCTGGGCT  
 Sa1 CTGAGCTGGACTGGCTGGGCTGGGCTGGGCTGGGCTGGGCTGGGCTGGGCTGGGCT  
 13 bp OL  
 2520 (15/16 bp) OL

306  
 Sμ TTGCACCAGGTGAGCTGAGCTGAGCTGGGCTGGGCTGGGCTGGGCTGGGCTGGGCT  
 P3-4b TTGCACCAGGTGAGCTGAGCTGAGCTGGGCTGGGCTGGGCTGGGCTGGGCTGGGCT  
 Sa1 TGAGCTGGACTGGCCTGGGCTGAGCTGGGCTGGGCTGGGCTGGGCTGGGCTGGGCT  
 13 bp OL  
 2481 (18/19 bp) OL

327  
 Sμ GCTTGGCTGCACTAAGCTGGGCTGAGCTGGGCTGGGCTGGGCTGGGCTGGGCTGGGCT  
 P3-15 GCTTGGCTGCACTAAGCTGGGCTGAGCTGGGCTGGGCTGGGCTGGGCTGGGCTGGGCT  
 Sa2 ACTGAGCTGGACTGAGCTGGGCTGGGCTGGGCTGGGCTGGGCTGGGCTGGGCTGGGCT  
 0 bp OL  
 2572 (4/5 bp) OL

382  
 Sμ GAGCTGAGCTGGGCTGGGCTGGGCTGGGCTGGGCTGGGCTGGGCTGGGCTGGGCT  
 P3-5a GAGCTGAGCTGGGCTGGGCTGGGCTGGGCTGGGCTGGGCTGGGCTGGGCTGGGCT  
 Sa1 GAGCTGGACTGGGCTGGGCTGGGCTGGGCTGGGCTGGGCTGGGCTGGGCTGGGCTGGGCT  
 24 bp OL  
 2477 (28/29 bp) OL

291  
 Sμ CTGGGCTAAGTTGCACCAGGTGAGCTGGGCTGGGCTGGGCTGGGCTGGGCTGGGCTGGGCT  
 P3-18 CTGGGCTAAGTTGCACCAGTTGAGCTGGGCTGGGCTGGGCTGGGCTGGGCTGGGCTGGGCT  
 Sa2 TGGACTGGGCTGGGCTGGGCTGGGCTGGGCTGGGCTGGGCTGGGCTGGGCTGGGCTGGGCT  
 4 bp OL  
 2259 (13/14 bp) OL



176  
 Sμ AAATGGACTCAGATGGGCAAACTGGACCTAAGCTGACCTAGACTAAACAA  
 P6-6 AAATGGACTCAGATGGGCAAACTGGACCTGGGCTAAGCTGAGCTGGGCTG  
 Sa2 AGCTGAGCTGTACTGAGCTGGACTGACCTGGGCTAAGCTGAGCTGGGCTG  
 8 bp OL  
 2318 (8/8 bp) OL

336  
 Sμ CACTAAGCTGGGCTGAGCTGGGCAAGGCTGGGCTGAGCTGAGCTGGGCTG  
 P6-13 CACTAAGCTGGGCTGAGCTGGGCAAGCTGAGATGTACTGAGCTGGCCTGGG  
 Sa1 GCTGTACTAAGCTGGCCTGGGCTGGCTGAGCTGACTGTACTGAGCTGGCCTGGG  
 1 bp OL  
 2502 (1/1 bp) OL

217  
 Sμ AAACAAGGCTGAACTGGGCTGAGCTGAGCTGAACTGGGCTGAGTTGAACT  
 P6-7 AAACAAGGCTGAACTGGGCTGAGCTGGGCTGAGCTGGGCTGGGCTGGACT  
 Sa1 GGGCGGGACTGAGCTGGACTGGCTGGGCTGAGCTGGGCTGGGCTGGACT  
 3 bp OL  
 2479 (8/9 bp) OL

186  
 Sμ AGATGGGCAAACTGACCTAAGCTGACCTAGACTAAACAAGGCTGAACTG  
 P6-14b AGATGGGCAAACTGACCTAAGCTGACCTGGGTGAGCTTAAGTGGACTGA  
 Sa1 GGCTGGGCTGAGCTGGACGGAGCTGACCTGGGTGAGCTTAAGTGGACTGA  
 9 bp OL  
 1837 (10/11 bp) OL

326  
 Sμ GCTGGGCTTGGCTGCACTAAAGCTGGGCTGAGCTGGGCTAGGGCTGGGCTGA  
 P6-8 GCTGGGCTTGGCTGCACTAAAGCTGGGCTGGGCTGGGCTGGGATGGGCTGAG  
 Sa1 GCTGGACTGAGCTGGACTGGCTGGGCTGGGCTGGGCTGGGATGGGCTGAG  
 8 bp OL  
 2517 (15/16 bp) OL

242  
 Sμ TGAGCTGAACTGGGCTGAGTTGAACTGGGTTGAGCTGAGCTGAGCTGAGC  
 P6-14a TGAGCTGAACTGGGCTGAGTTGAACTGAGCTGGACTGGCCTGGGCTGGGC  
 Sa1 TGGGCTGAGCTGGGCTGGGCTGGGCTGGGCTGGGCTGGGCTGGGCTGGGC  
 4 bp OL  
 2501 (6/7 bp) OL

217  
 Sμ AAACAAGGCTGAACTGGGCTGAGCTGAGCTGAACTGGGCTGAGTTGAACT  
 P6-9 AAACAAGGCTGAACTGGGCTGAGCTGGGCCAGGCTGAGCTGGGCTGGGCT  
 Sa1 GAGCTGAGCTGTACTGAGCTGGCTGGGCCAGGCTGAGCTGGGCTGGGCT  
 3 bp OL  
 2295 (5/6 bp) OL

362  
 Sμ GCAGGGCTGGGCTGAGCTGGGCTGGGCTGGGCTGAGCTGGGCTGGGCTGG  
 P6-15 GCAGGGCTGGGCTGAGCTGGGCTGGGCTGGGCTGGGCTGAGCTGGGCTGG  
 Sa1 ACTGGGCTGGGCTGAGCTGGGCTGGGCTGGGCTGGGCTGGGCTGGGCTGG  
 10 bp OL  
 2491 (23/24 bp) OL

333  
 Sμ CTTGGCTGCACTAAAGCTGGGCTGAGCTGGGCTCAGGGCTGGGCTGAGCTGAG  
 P6-10 CTTGGCTGCACTAAAGCTGGGCTGAGCTGGGCTGAGCTGGGCTGGGCTGGG  
 Sa1 CTGAGCTGGGCTGGGCTGGGCTGAGCTGGGCTGAGCTGGGCTGGGCTGGG  
 9 bp OL  
 2502 (14/15 bp) OL

271  
 Sμ GTTGGCTGAGCTGAGCTGAGCTGAGCTGGGCTAAGTTGCACCAGGTGAGCTGAG  
 P6-17 GTTGGCTGAGCTGAGCTGAGCTGAGCTGGGCTGGGCTGGGCTGGGCTGGG  
 Sa1 GCTGGACTGAGCTGGGCTGGGCTGGGCTGGGCTGGGCTGGGCTGGGCTGGG  
 7 bp OL  
 2517 (7/7 bp) OL

2377  
 Sμ CTGAGCCGACTGGGCTGGGCTGGGCTGAGCTGAGCTGAGCTGAACTGGG  
 P6-12a CTGAGCCGACTGGGCTGGGCTGGGCTGGGCTGGGCTGGGCTGGGCTGGG  
 Sa1 CTGGGCTGGGCTGAGCTGGGCTGGGCTGGGCTGGGCTGGGCTGGGCTGGG  
 2 bp OL  
 2517 (6/7 bp) OL

337  
 Sμ CACTAAGCTGGGCTGAGCTGGGCAAGGCTGGGCTGAGCTGAGCTGGGCTG  
 P6-18 CACTAAGCTGGGCTGAGCTGGGCAAGGCTGGGCTGAGCTGGGCTGGGCTG  
 Sa1 GACTGGGCGGACTGAGCTGGGCTGGGCTGGGCTGGGCTGGGCTGGGCTGGG  
 2 bp OL  
 2474 (15/16 bp) OL

191  
 Sμ CAAAAGTACCTAAGCTGACCTAAGCTAAGCTAAGCTAAGCTAAGCTGAG  
 P6-12b CAAAAGTACCTAAGCTGACCTAAGCTAAGCTAAGCTAAGCTAAGCTGAG  
 Sg3 GCTGACCTGGGCTGAGCTTAAGTGGGCTGAGCTGAGCTGGGCTGGGCTGGG  
 4 bp OL  
 1861 (5/6 bp) OL

165  
 Sμ CCAGCTTTCAGAAATGACTCAGATGGGCTAAGCTGACCTAAGCTGACCT  
 P8-2 CCAGCTTTCAGAAATGACTCAGATGGGCTGGGCTGGGCTGGGCTGGGCTGGG  
 Sa1 GGATGGGATGGGCTAGGATGACTTGGGCTGGGCTGGGCTGGGCTGGGCTGGG  
 5 bp OL  
 2443 (5/5 bp) OL

331  
 Sμ TGGCTGCACTAAGCTGGGCTGAGCTGGGCAGGGCTGGGCTGAGCTGAGCT  
 P8-4 TGGCTGCACTAAGCTGGGCTGAGCTCTGGGCTGAGCTGGGCTGAGCTGGG  
 Sα2 CTGTACTGAGCTGCCCTGGGGTGGGCTGGGCTGAGCTGGGCTGAGCTGGG  
 0 bp OL  
 2513 (0/0 bp) OL

104  
 Sμ TTTAGCTGAGACAAGCAGGTCTGGTGGGCTGACCATTCTGGCCATGACA  
 P8-6 TTTAGCTGAGACAAGCAGGTCTGGTACTGAGCTGCCCTGGGGTGGGCTGG  
 Sα2 GCTGGGCTGGGCTGGGATGAGCTGTACTGAGCTGCCCTGGGGTGGGCTGG  
 2 bp OL  
 1490 (2/2 bp) OL

244  
 Sμ GAGCTGAAGTGGGCTGAGTTGAAGCTGGGTGAGCTGAGCTGAGCTGAGCT  
 P8-8 GAGGTGAAGTGGGCTGAGTTGAAGCTGGGCTGCCCTGGGTTGAGCTGAGCT  
 Sα1 GGGCTGGGCTGGGCTTGACGAGCTGGGCTGCCCTGGGTTGAGCTGAGCT  
 5 bp OL  
 1060 (7/8 bp) OL

221  
 Sμ TAAACAAGGCTGAAGCTGGGCTGAGCTGAGCTGAAGTGGGCTGAGTTGAAC  
 P8-11 TAAACAAGGCTGAAGCTGGGCTGAGCTGAGCTAGACTGGGCTGAGCTGGGT  
 Sα2 TAGACTGGGCTGAGCTGGACTGAGCTGAGCTAGACTGGGCTGAGCTGGGT  
 12 bp OL  
 2383 (16/17 bp) OL

324  
 Sμ GGGCTTGGCTGCACTAAGCTGGGCTGAGCTGGGCTAGGGCTGGGCTGAGCT  
 P9-1 GGGCTTGGCTGCACTAAGCTGGGCTGAGCTGGGCTGGGCTGGACTGAGCT  
 Sα1 GGACTGAGCTGGACTGGCCTGGGCTGAGCTGGGCTGAGCTGGGCAGGGCT  
 1 bp insertion  
 2484 (9/10 bp) OL

271  
 Sμ GTTGAAGCTGAGCTGAGCTGAGCTGGGCTAAGTTGCACCAGGTGAGCTGAG  
 P9-6 GTTGAAGCTGAGCTGAGCTGAGCTGGGCTGGGCTGGGCGGGATGGGCTGAG  
 Sα1 GCTGGACTGAGCTGGACTGGCCTGGGCTGGGCTGGGCGGGATGGGCTGAG  
 7 bp OL  
 2517 (7/7 bp) OL

303  
 Sμ AGTTGCACCAGGTGAGCTGAGCTGAGCTGGGCTTGGCTGCACTAAGTGGG  
 P9-8 AGTTGCACCAGGTGAGCTGAGCTGAGCTGGACTAAGCTGGGCTGACCTGG  
 Sα1 CCTGGGCTGGGTTGACTGGGCTGAGCTGGACTAAGCTGGGCTGACCTGG  
 10 bp OL  
 2387 (13/14 bp) OL

173  
 Sμ GAAATGGACTCAGATGGGCAAAACTGACCTAAGCTGACCTAGACTAAACA  
 P2-1 GAAATGGACTCAGATGGGCAAAACTGACCTGAAGCTGGGCTGGACTGGGCT  
 Sα1 TGGCGGGGTGAGCTGGGTTGGGCTGACCTGAAGCTGGGCTGGACTGGGCT  
 4 bp OL  
 2210 (6/7 bp) OL

326  
 Sμ AGCTGGGCTTGGCTGCACTAAGCTGGGCTGAGCTGGGCTCAGGGCTGGGCTG  
 P2-2 AGCTGGGCTTGGCTGCACTAAGCTGGGCTGGGCTGGACTGAGCTGGACTG  
 Sα2 GGCTGGGCTGAGCTGGGCTGAGCTGGGCTGGGCTGGACTGAGCTGGACTG  
 10 bp OL  
 2531 (15/16 bp) OL

995  
 Sμ ACCTGGACTGGGCTGAGCTAACCTGGGCTAGAGCTGAGCTGGGCTGAGCT  
 P2-3 ACCTGGGCTGGGCTGAGCTAACCTGGGCTGGGATGGGATGGGCTAGGAT  
 Sα1 TGAGCTGGACTAAGCTGGGCTAACCTGGGCTGGGATGGGATGGGCTAGGAT  
 8 bp OL  
 2410 (11/12 bp) OL

432  
 Sμ AGCGGGCTGAGCTGAGCTAGGCTGGGCTGGGCTGAGCTGGGCTGAGCTG  
 P2-4 AGCGGGCTGAGCTGAGCTAGGCTGGGCTGGGCTGAGCTGGGCTGAGCTG  
 Sα1 GACTGGCCTGGGCTGAGCTAGGCTGGGCTGGGCTGAGCTGGGCTGAGCTG  
 11 bp OL  
 2490 (20/21 bp) OL

334  
 Sμ GGCTTGGCTGCACTAAGCTGGGCTGAGCTGGGCTAGGGCTGGGCTGAGCTG  
 P2-6 GGCTTGGCTGCACTAAGCTGGGCTGAGCTGGGCTGGGCTGGACTGAGCTG  
 Sα1 GACTGAGCTGGACTGGCCTGGGCTGAGCTGGGCTGGGCTGGGCTGGGCTG  
 16 bp OL  
 2477 (23/24 bp) OL

367  
 Sμ TGGGCTGAGCTGAGCTGGGCTGGGCTGGGCTGGGCTGGGCTGGGCTGGG  
 P2-7 TGGGCTGAGCTGAGCTGGGCTGGGCTGGGCTGGGCTGGGCTGGGCTGGG  
 Sα1 CTGGGCTGAGCTGGACTAAGCTGGGCTGGGCTGGGCTGGGCTGGGCTGGG  
 9 bp OL  
 2402 (19/20 bp) OL

357  
 Sμ GCTGGGCAAGGCTGGGCTGAGCTGAGCTGGGCTGGGCTGAGCTGGGCTGG  
 P2-8 GCTGGGCAAGGCTGGGCTGAGCTGAGCTGGGCTGGGCTGGGCTGGGCTGG  
 Sα1 GCTGAGCTGGGCTGGGCTGGGCTGAGCTGAGCTGGGCTGGGCTGGGCTGG  
 9 bp OL  
 2502 (13/14 bp) OL

203

Sμ TAAGCTGACCTAGACTAAACAASGGCTGAACTGGGCTGAGCTGAGCTGAAC  
 P10-1 TAAGCTGACCTAGACTAAACAASGGCTGACCTGGGCTGGCTGACCTGGGC  
 Sα1 TGGGCTGGGCTGAGCTGAGCTGSGCTGACCTGGGCTGGCTGACCTGGGC  
 6 bp OL  
 1372 (14/15 bp) OL

173

Sμ AATGGACTCAGATGGGCAAAACTGACCTAAGCTGACCTAGACTAAACAAG  
 P10-2 AATGGACTCAGATGGGCAAAACTGAGGTGGGCTAAGCTGGGCTGGGCTGG  
 Sα1 GGTGGGCTGAGCTAGGCTGAGCTGGGCTGGGCTGAGCTGGGCTGGGCTGG  
 0 bp OL  
 2095 (3/4 bp) OL

232

Sμ ACTGGGCTGAGCTGAGCTGAACTGGGCTGAGTTGAACTGGGTTGAGCTGA  
 P10-4 ACTGGGCTGAGCTGAGCTGAACTGGGCTGGCTGGGCTGAGCTGAGCTGA  
 Sα1 ACTGGGCTGGACTGGGCTGGGCTGGGCTGGGCTGAGCTGAGCTGA  
 8 bp OL  
 2251 (9/10 bp) OL

411

Sμ TGGGCTGAGCGGGTCTGAGCGGGCTGAGCTGAGCTAGGCTGGGCTGGGC  
 P10-5 TGGGCTGAGCGGGTCTGAGCGGGCTGGCTGAGCTGAGCTGGGCTGGGCTGGAC  
 Sα1 TGGGCGGGACTGAGCTGGACTGGCTGGCTGGCTGAGCTGGGCTGGGCTGGAC  
 3 bp OL  
 2478 (11/12 bp) OL

232

Sμ ACTGGGCTGAGCTGAGCTGAACTGGGCTGAGTTGAACTGGGTTGAGCTGA  
 P10-6 ACTGGGCTGAGCTGAGCTGAACTGGGCTGACTGAGCTGGACTGGCCTGG  
 Sα1 ACTGGCCTGGGCTGAGCTGGGCTGGGCTGACTGAGCTGGACTGGCCTGG  
 8 bp OL  
 2492 (8/8 bp) OL

356

Sμ GCTGGGCAGGGCTGGGCTGAGCTGAGCTGGCTGGGCTGAGCTGGGCTGG  
 P10-9 GCTGGGCAGGGCTGGGCTGAGCTGAGCTGAACTGGGCTGGACTGGGCTGG  
 Sα1 GGCGGGGTGAGCTGGGTTGGCTGAGCTGAACTGGGCTGGACTGGGCTGG  
 9 bp OL  
 2209 (11/12 bp) OL

334

Sμ TTGGCTGCACTAAGCTGGGCTGAGCTGGGCTAGGGCTGGGCTGAGCTGAGC  
 P10-10 TTGGCTGCACTAAGCTGGGCTGAGCTGGGCTGGGCTGGACTGAGCTGGAC  
 Sα2 TGGGCTGGGCTGAGCTGGGCTGAGCTGGGCTGGGCTGGACTGAGCTGGAC  
 18 bp OL  
 2521 (25/26 bp) OL

271

Sμ GGTGAGCTGAGCTGAGCTGAGCTGGGCTAAGTTGCACCAGGTGAGCTGA  
 P10-11 GGTGAGCTGAGCTGAGCTGAGCTGGGCTGGACTGAGCTGGACTGGCCTG  
 Sα1 GACTGGCCTGGCTGAGCTGGCTGGGCTGGACTGAGCTGGACTGGCCTG  
 8 bp OL  
 2491 (17/18 bp) OL

142 1342

Sμ CTCCATCCAGCTTTCAG..AGCTGAGTGATGCCTCCCACCGTCCCTGCTSy4r  
 P8-3 CTCCATCCAGCAGGAGGAGCAGGGGAGTGATGCCTCCCACCGGCCCTGCT  
 Sy4 GCAGGTGGGCAAGGAGGAGCAGGGGCACCTCCTGGAGCTCAGGCACCGG  
 2 bp OL  
 3180 (2/2 bp) OL

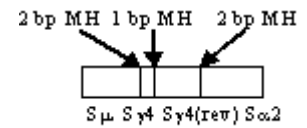



SMC1A<sup>-/-</sup> patients S1-S3

Sμ AGCTTTCAGAAATGGACTCAGATGGGCAAAACTGACCTAAGCTGACCTAG  
 S1-1 AGCTTTCAGAAATGGACTCAGATGGGCTGAGCTGGACTGGCCAGGGCTGG  
 Sα1 CCTGGGCTGAGCTGGGCTGGGCTGGACTGAGCTGGACTGGCCTGGGCTGG  
 1 bp OL  
 2502 (4/5 bp) OL

Sμ GGGTTGAGCTGAGCTGAGCTGAGCTGGGCTAAGTTGCACCAGGTGAGCTG  
 S1-2B GGGTTGAGCTGAGCTGAGCTGAGCTGGGCTGGGATGGGATGGGCTAGGAT  
 Sα1 TGAGCTGGACTAACTGGGCTGAGCTGGGCTGGGATGGGATGGGCTAGGAT  
 7 bp OL  
 2412 (12/13 bp) OL

Sμ CTGAACTGGGCTGAGTTGAACTGGGCTTGAGCTGAGCTGAGCTGAGCTGGG  
 S1-2C CTGAACTGGGCTGAGTTGAACTGGGCTGGCTGAGCTGGGCTGGGCTGGACTG  
 Sα1 GGCGGGACTGAGCTGGACTGGCCTGGGCTGAGCTGGGCTGGGCTGGACTG  
 1 bp OL  
 2479 (1/1 bp) OL

Sμ AAATGGACTCAGATGGGCAAAACTGACCTAAGCTGACCTAGACTAAACAA  
 S1-4 AAATGGACTCAGATGGGCAAAACTGACTGAGCTGGGCTGGGCTGAGCTGA  
 Sα1 GAGCTGACTGGGTGAGCTGAGGTGGACTGAGCTGGGCTGGGCTGAGCTGA  
 3 bp OL  
 1990 (3/3 bp) OL

Sμ TAAACAAGGCTGAAGTGGCTGAGCTGAGCTGAACTGGGCTGAGTTGAAC  
 S1-5 TAAACAAGGCTGAAGTGGCTGAGCTGAGCTGGTTGCGTTGACCTGGGC  
 Sα2 TGAGCTGGACTGAGCTATGCTGAGCTGAGCTGGTTGCGTTGACCTGGGC  
 14 bp OL  
 2148 (14/14 bp) OL

Sμ TGGGCAAAACTGACCTAAGCTGACCTAGACTAAACAAGGCTGAAGTGGGC  
 S1-6 TGGGCAAAACTGACCTAAGCTGAGCTGGACTGAGCTGGACTGAGCTGGAC  
 Sα2 TGAGCTGGGCTGAGCTGGCTGGGCTGGACTGAGCTGGACTGAGCTGGAC  
 0 bp OL  
 2542 (4/5 bp) OL

Sμ CTGACCTAGACTAAACAAGGCTGAAGTGGGCTGAGCTGAGCTGAAGTGG  
 S1-7A CTGACCCAGACTAAACAAGGCTGAATGGGCTGGGTTGACCTGGGCTGAGC  
 Sα1 CTGGCTGAGCTGTACTGAGCTGGCCTGGGCTGGGTTGACCTGGGCTGAGC  
 0 bp OL  
 2369 (0/0 bp) OL

Sμ GCTGGGCAGGGCTGGGCTGAGCTGAGCTGGGCTGGGCTGAGCTGGGCTGG  
 S1-7C GCTGGGCAGGGCTGGGCTGAGCTGGGCTGGGCTGGGCTGGGCTGGGCTGG  
 Sα1 ACTGAGCTGGACTGGCCTGGGCTGGGCTGGGCTGGGCTGGGCTGGGCTGG  
 4 bp OL  
 2521 (11/12 bp) OL

Sμ AGCTTTCAGAAATGGACTCAGATGGGCAAAACTGACCTAAGCTGACCTAG  
 S1-9 AGCTTTCAGAAATGGACTCAGATGGGCTGGACTGGCCTGGGCTGGGCTGGG  
 Sα1 CTGAGCTGGGCTGGGCTGGACTGAGCTGGACTGGCCTGGGCTGGGCTGGG  
 1 bp OL  
 2506 (1/1 bp) OL

Sμ TTGGCTGCACTAAGCTGGGCTGAGCTGGGCTGGGCTGGGCTGAGCTGAGC  
 S1-10A TTGGCTGCACTAAGCTGGGCTGAGCTGGGCTGGGCTGGGCTGAGCTGAGC  
 Sα1 TGAGCTGGACTGGCTGGGCTGAGCTGGGCTGGGCTGGGCTGAGCTGAGC  
 16 bp OL  
 2477 (23/24 bp) OL

Sμ TGGGCTTGGCTGCACCTAAGCTGGGCTGAGCTGGGCTGGGCTGGGCTGAGC  
 S1-10B TGGGCTTGGCTGCACCTAAGCTGGGCTGAGCTGGGCTGGGCTGGGCTGGG  
 Sα1 TGGGCTGAGCTGGACTAAGCTGGGCTGAGCTGGGCTGGGCTGGGCTGGG  
 15 bp OL  
 2397 (21/22 bp) OL

Sμ TGCACCAGGTGAGCTGAGCTGAGCTGGGCTGGGCTGGGCTGAGCTGGGCTG  
 S2-2 TGCACCAGGTGAGCTGAGCTGAGCTGGGCTGGGCTGGGCTGAGCTGGGCTG  
 Sα1 GAGCTGGACTGGCCTGGGCTGAGCTGGGCTGGGCTGGGCTGAGCTGGGCTG  
 13 bp OL  
 2481 (18/19 bp) OL

Sμ GGGCTTGGCTGCACTAAGCTGGGCTGAGCTGGGCTGGGCTGGGCTGAGCT  
 S2-3 GGGCTTGGCTGCACTAAGCTGGGCTGGGCTGGGCTGGGCTGGGCTGGGCTG  
 Sα1 GGACTGAGCTGGACTGGCCTGGGCTGGGCTGGGCTGGGCTGGGCTGGGCTG  
 8 bp OL  
 2517 (15/16 bp) OL

Sμ GGCTGAGTTGAACTGGGTTGAGCTGAGCTGAGCTGAGCTGGGCTAAGTTG  
 S2-4 GGCTGAGTTGAACTGGGTTGATCTGACTGGCCTGGGCTGAGCTGGGCTGG  
 Sα1 GCTGGACTGGGCGGACTGAGCTGAGCTGGGCTGGGCTGGGCTGGGCTGGG  
 2 bp OL  
 2470 (2/2 bp) OL

316  
 Sμ CTGAGCTGGGCTTGGCTGCACTAAGCTGGGCTGAGCTGGGCAGGGCTGGG  
 S2-7 CTGAGCTGGGCTTGGCTGCACTAAGCTGGGCTGGGCTGGGCTGAGCTGTA  
 Sα1 CTGGGCTGGGCTGAGCTGTACTAAGCTGGGCTGGGCTGGGCTGAGCTGTA  
 2332 1 bp insertion (6/7 bp) OL

366  
 Sμ GGGCAGGGCTGGGCTGAGCTGAGCTGGGCTGGGCTGAGCTGGGCTGGGCT  
 S2-9 GGGCAGGGCTGGGCTGAGCTGAGCTGGGCTGGGCTGAGCTGAGCTGGACT  
 Sα2 GGGCTGGGCTGAGCTGAGCTGAGCTGGGCTGGGCTGAGCTGAGCTGGACT  
 2527 19 bp OL (23/24 bp) OL

179  
 Sμ TCAGATGGGCAAACCTGACCTAAGCTGACCTAGACTAAACAAGGCTGAAC  
 S3-1A TCAGATGGGCAAACCTGACCTAAGCTGACCTAGACTAGACTAGACTGGGC  
 Sα2 TGGGCTGGGCTAGACTGGGCTGAGCTGAGCTGAGCTAGACTAGACTGGGC  
 2380 1 bp insertion (2/3 bp) OL

202  
 Sμ TAAGCTGACCTAGACTAAACAAGCTGAACTGGGCTGAGCTGAGCTGAAC  
 S3-1B TAAGCTGACCTAGACTAAACAAGCTGGCCTGGGCCAGGCTGAGCTGGGC  
 Sα1 TGAGCTGAGCTGAGCTGTACTGAGCTGGCCTGGGCGAG CTGAGCTGGGC  
 2289 4 bp OL (4/4 bp) OL

198  
 Sμ CCTAAGCTGACCTAGACTAAACAAGGCTGAACTGGGCTGAGCTGAGCTGA  
 S3-2-2 CCTAAGCTGACCTAGACTAAACAACCCTGGGCTGGGTTGGACTGGTCTGG  
 Sα1 GCTGAGCTGGGCTGGGTTGGACTGCGCTGGGCTGGGTTGGACTGGTCTGG  
 1687 0 bp OL (0/0 bp) OL

319  
 Sμ TGAGCTGGGCTTGGCTGCACTAAGCTGGGCTGAGCTGGGCAGGGCTGGGC  
 S3-2B TGAGCTGGGCTTGGCTGCACTAAGCTGGGCTGGGCTGAGCTGGGCTGGGC  
 Sα1 TGGACTGGGCGGACTGAGCTGGACTGGGCTGGGCTGAGCTGGGCTGGGC  
 2472 4 bp OL (7/8 bp) OL

352  
 Sμ TGAGCTGGGCAGGGCTGGGCTGAGCTGAGCTGGGCTGGGCTGAGCTGGGC  
 S3-3A TGAGCTGGGCAGGGCTGGGCTGAGCTGAGCTGGGCTGGGCTGGGATGGGCT  
 Sα1 CTGGGCTGAGCTGGACTAACTGGGCTGAGCTGGGCTGGGATGGGCT  
 2406 5 bp OL (14/15 bp) OL

182  
 Sμ TCAGATGGGCAAACCTGACCTAAGCTGACCTAGACTAAACAAGGCTGAAC  
 S3-4A TCAGATGGGCAAACCTGACCTAAGCTGACCTGGGCTGGGTTGACCTGGGC  
 Sα1 CTGGGCTGGGCTGAGCTGTACTGAGCTGACCTGGGCTGGGTTGACCTGGGC  
 2361 5 bp OL (8/9 bp) OL

173  
 Sμ GAAATGGACTCAGATGGGCAAACCTGACCTAAGCTGACCTAGACTAAACA  
 S3-5A GAAATGGACTCAGATGGGCAAACCTGAGGTTGACTAAGCTGGCCTGGGCT  
 Sα1 TGGGCGAGCTGAGCTGGGCTGGGCTGAGCTGTACTAAGCTGGCCTGGGCT  
 2319 4 bp OL (4/4 bp) OL

452  
 Sμ TGGGCTGGGCTGAGCTGGGCTGAGCTGGGCTGAGCTGGGCTGAGCAAGGC  
 S3-5C TGGGCTGGGCTGAGCTGGGCTGAGCTGGGCTGAGCTGGGCTGAGCTGGGC  
 Sα1 TGGCTGGGCTGAGCTGGGCTGAGCTGGGCTGAGCTGGGCTGAGCTGGGC  
 2497 5 bp OL (23/24 bp) OL

232  
 Sμ AACTGGGCTGAGCTGAGCTGAACTGGGCTGAGTTGAACTGGGTTGAGCTG  
 S3-6B AACTGGGCTGAGCTGAGCTGAACTGGGCTGGATGAGCTGAGTTGGCTGCT  
 Sα1 AGCTGGACTGGCCTGGGCTGGGCTGGGCTGGGCTGGATGAGCTGAGTTGGCTGCT  
 2583 8 bp OL (8/8 bp) OL

342  
 Sμ TAAGCTGGGCTGAGCTGGGCTGGGCTGGGCTGAGCTGAGCTGGGCTGGGC  
 S3-7A TAAGCTGGGCTGAGCTGGGCTGGGCTGGGCTGGGCTGAGCTGGGCTGGGC  
 Sα1 TGGCTGGGCTGAGCTGGGCTGGGCTGGGCTGGGCTGGGCTGAGCTGGGCTGGGC  
 2494 7 bp OL (23/24 bp) OL

208  
 Sμ GACTAAACAAGGCTGAACTGGGCTGAGCTGAGCTGAACTGGGCTGAGTTG  
 S3-8A GACTAAACAAGGCTGAACTGGGCTGAGCTGGGCTGGCCTGAGCTGGGCTG  
 Sα1 CCCTGGGTTGAGCTGAGCTGAGCTGGGCTGGGCTGGGCTGGGCTGGGCTG  
 995 1 bp insertion (8/8 bp) OL

356  
 Sμ GGGCAGGGCTGGGCTGAGCTGAGCTGGGCTGGGCTGAGCTGGGCTGGGCT  
 S3-9B GGGCAGGGCTGGGCTGAGCTGAGCTGGGCTGGGCTGGGCTGGGCTGGGCT  
 Sα1 GGGCTGAGCTGAGCTGAGCTGTACTGAGCTGGGCTGGGCTGGGCTGGGCT  
 2285 3 bp OL (8/9 bp) OL



**SMC1A<sup>-/-</sup> patient S4**

210  
 Sμ GACCTAGACTAAACAAGGCTGAACTGGGCTGAGCTGAGCTGAACTGGGCTG  
 S4-1 GACCTAGACTAAACAAGGCTGAACTGGGCTGAGCTGAGCTGAGTTGGGCTG  
 Sa1 GAGCTGGGCTAGGCTAAGCTAGGCTGGGCTGAGCTGAGCTGAGTTGGGCTG  
 2186 6 bp OL  
 (17/18 bp) OL

232  
 Sμ GGCTGAGCTGAGCTGAACTGGGCTGAGCTGAACTGGGTTGAGCTGAGCTGA  
 S4-2 GGCTGAGCTGAGCTGGACTGGGCTGGCCGAAGCTGAGCTAGACTGGGCTGA  
 Sa1 GGGCTGAGCTGAGCTGGACTGGGCTGGCCGAAGCTGAGCTAGACTGGGCTGA  
 2029 0 bp OL  
 (1/2 bp) OL

434  
 Sμ GCGGGGCTGAGCTGAGCTAGGCTGGGCTGGGCTGAGCTGGGCTGAGCTGGG  
 S4-3 GCGGGGCTGAGCTGAGCTAGGCTGGGCTGGGCTGGGATGGGCTGAGGTGGCT  
 Sa1 ACTGAGCTGGACTGGGCTGGGCTGGGCTGGGATGGGCTGAGGTGGCT  
 2520 13 bp OL  
 (15/16 bp) OL

3214  
 Sμ TGAGCTGGGCTGAGCTGGGCTGAGTTGAGCAGAGCTGGGTTGAGCAGAGC  
 S4-4 TAAGCTGGGCTGAGCTGGGCTGAGTTGGGCAGGGCTGGACTGAGCTGGAC  
 Sa1 TGAGCTGGACTGGCTGGGCTGAGCTGGGCTGGGCTGGACTGAGCTGGAC  
 2488 1 bp Insertion  
 (10/11 bp) OL

2763  
 Sμ AGCTGGGCTGGGTTGAGCAGAGCTGGGTTGAGCTGAGCTGGGCTGGGCTG  
 S4-5a AGCTGGGCTGGGTTGAGCAGAGCTGGGTTGGCTGGGCTGGGCGGATGGGCTGAG  
 Sa1 GCTGGACTGAGCTGGACTGGCCTGGGCTGGGCTGGGCGGATGGGCTGAG  
 2520 2 bp OL  
 (2/3 bp) OL

257  
 Sμ AGTTGAACTGGGTTGAGCTGAGCTGAGCTGAGCTGGGCTAAGTTGCACCA  
 S4-5b AGTTGAACTGGGTTGAGCAGAGCTGGCTGGGCTGGGCGGATGGGCTGAG  
 Sa1 GCTGGACTGAGCTGGACTGGCCTGGGCTGGGCTGGGCGGATGGGCTGAG  
 2520 1 bp OL  
 (1/2 bp) OL

263  
 Sμ GAACTGGGTTGAGCTGAGCTGAGCTGAGCTGGGCTAAGTTGCACCAGGTGA  
 S4-6 GAACTGGGTTGAGCTGAGCTGAGCTGAGCTGGGCTGAGCTGGACTAAGCTG  
 Sa1 GTACTGAGCTGGCCTGGGCTGGGTTGAGCTGGGCTGAGCTGGACTAAGCTG  
 2379 3 bp OL  
 (10/11 bp) OL

268  
 Sμ ACTGGGTTGAGCTGAGCTGAGCTGAGCTGGGCTAAGTTGCACCAGGTGAGC  
 S4-7 CCTGGGCTGAGCTGAGCTGAGCTGAGCTGGACTGGCCTGGGCTGGGCTGGG  
 Sa1 GCTGAGCTGGGCTGGGCTGGACTGAGCTGGACTGGCCTGGGCTGGGCTGGG  
 2502 9 bp OL  
 (11/12 bp) OL

212  
 Sμ ACCTAGACTAAACAAGGCTGAACTGGGCTGAGCTGAGCTGAACTGGGCTGA  
 S4-8 ACCTAGACTAAACAAGGCTGAACTGGGCTGGCTGGACTGAGCTGGACTGG  
 Sa1 AGCTGGACTGGCCTGGGCTGAGCTGGGCTGGCTGGACTGAGCTGGACTGG  
 2487 8 bp OL  
 (14/15 bp) OL

386  
 Sμ TGGGCTGAGCTGGGCTGGGCTGGGCTGGGCTGGGCTGAGCGGGTCTGAGCGGGC  
 S4-9a TGGGCTGAGCTGGGCTGGGCTGGGCTGGGCTGACTAAGCTGGCCTGGGCTGGGC  
 Sa1 CGAGCTGAGCTGGGCTGGGCTGGGCTGGGCTGACTAAGCTGGCCTGGGCTGGGC  
 2323 4 bp OL  
 (23/24 bp) OL

613  
 Sμ TGGGCTAGGCTGGGCTGAGCTGGGCTGAGCTGGGCTGGGCTGGGCTGGGC  
 S4-9b TGGGCTAGGCTGGGCTGAGCTGGGCTGAGCTGGGCTGCTAATGTGGGAAAG  
 Sa1 CTGGGCTGGGCTGGGCGGATGGGCTGAGCTGGGCTGCTAATGTGGGAAAG  
 2537 9 bp OL  
 (10/11 bp) OL

327  
 Sμ GCTTGGCTGCACTAAGCTGGGCTGAGCTGGGCTGGGCTGGGCTGAGCTGAG  
 S4-10-1 GCTTGGCTGCACTAAGCTGGGCTGAGCTGGGCTGGGCTGGGCTGGATGAGC  
 Sa2 ACTGAGCTGGACTGAGCTGGACTGGGCTGGGCTGGGCTGGGCTGGATGAGC  
 2573 1 bp insertion  
 (6/7 bp) OL

248  
 Sμ GCTGAACTGGGCTGAGTTGAACTGGGTTGAGCTGAGCTGAGCTGAGCTGGG  
 S4-10-2 GCTGAACTGGGCTGAGTTGAACTGGGTTGAGCTGGGCTGAGCTGGACTAAG  
 Sa1 GCTGTACTGAGCTGGCCTGGGCTGGGTTGAGCTGGGCTGAGCTGGACTAAG  
 2373 9 bp OL  
 (12/13 bp) OL

566  
 Sμ CTGCGCTGAGCTGGGCTGGGCTGGGCTGGGCTGAGCTGGGCTGGGCTGAGCTGGG  
 S4-13-1 CTGCGCTGAGCTGGGCTGGGCTGGGCTGGGCTGGATGAGCTGAGGTGGCTGCTAAT  
 Sa2 CTGGACTGGCCTGGGCTGGGCTGGGCTGGGCTGGATGAGCTGAGGTGGCTGCTAAT  
 2587 4 bp OL  
 (17/18 bp) OL

337  
 ▼  
 Sμ CACTAAGCTGGGCTGAGCTGGGCAGGCTGGGCTGAGCTGAGCTGGGCTGG  
 S4-13-2 CACTAAGCTGGGCTGAGCTGGGCAGGCTGGGCTGAGCTGGGCTGG  
 Sa1 GGCTGGACTGGGCGGGACTGAGCTGGGCTGGGCTGAGCTGGGCTGG  
 ▲ 2 bp OL  
 2469 (6/7 bp) OL

254  
 ▼  
 Sμ GCTGAGTTGAACTGGGTTGAGCTGAGCTGAGCTGAGCTGGGCTAAGTTGCA  
 S4-14 GCTGAGTTGAACTGGGTTGAGCTGAGCTGAGCTGAGCTGGGCTAAGTTGCA  
 Sa1 GACTAACTGGGCTGACCTGGGCTGGGCTGAGCTGAGCTGGGCTAAGTTGCA  
 ▲ 1 bp OL  
 2421 (5/6 bp) OL

420  
 ▼  
 Sμ GCTGAGCGGGTCTGAGCTGGGCTGAGCTGAGCTAGGCTGGGCTGGGCTGAG  
 S4-15 GCTGAGCGGGTCTGAGCTGGGCTGAGCTGAGCTAGGCTGGGCTGGGCTGAG  
 Sa1 GCTGGGCTGGGCTGGGCTGGGCTGGGCTGAGCTGAGCTAGGCTGGGCTGGGCTGAG  
 ▲ 15 bp OL  
 2262 (17/18 bp) OL

291  
 ▼  
 Sμ GGGCTAAGTTGCACCAGGTGAGCTGAGCTGAGCTAGGCTGGGCTGGGCTGCACT  
 S4-16 GGGCTAAGTTGCTCCAGGTGAGCTGAGCTGAGCTAGGCTGGGCTGGGCTGCACT  
 Sa1 GGATGACTTGGGCTGGGCTGGGCTGGGCTGGGCTGGGCTGGGCTGGGCTGCACT  
 ▲ 1 bp OL  
 2459 (3/4 bp) OL

160  
 ▼  
 Sμ ATCCAGCTTTCAGAAATGGACTCAGCTGGGCAAACCTGACCTAAGCTGACC  
 S4-18 ATCCAGCTTTCAGAAATGGACTCAGCTGGGCAAACCTGACCTAAGCTGACC  
 Sa1 ACTGGTCTGGGCTGACCTGAGCTGACTGAGCTGGTCTGACCTGTGCTGAG  
 ▲ 1 bp OL  
 1728 (1/1 bp) OL





221  
 Sμ AAGGCTGAACTGGGCTGAGCTGAGCTGAACTGGGCTGAGTTGAACTGGGT  
 S9-8 AAGGCTGAACTGGGCTGAGCTGAGCTATACTGAGCTGGACTGACCTGGGC  
 Sα2 TGGACTGGGCTGGGCTGAGCTGAGCTGTACTGAGCTGGACTGACCTGGGC  
 1 bp Insertion  
 2311 (17/18 bp) OL

327  
 Sμ CTGGGCTTGGCTGCACTAAGCTGGGCTGAGCTGGGCAGGGCTGGGCTGAG  
 S9-9 CTGGGCTTGGCTGCACTAAGCTGGGCTGGGCTGGGCAGGATGGGCTGAGG  
 Sα1 CTGGACTGAGCTGGACTGGCTGGGCTGGGCTGGGCAGGATGGGCTGAGG  
 8 bp OL  
 2518 (15/16 bp) OL

353  
 Sμ GCTGGGCAGGGCTGGGCTGAGCTGAGCTGGGCTGGGCTGAGCTGGGCTGG  
 S9-10 GCTGGGCAGGGCTGGGCTGAGCTGACCTGGGCTGGACTGAGCTGGACTGG  
 Sα1 GCTGACTGGCCTGGGCTGAGCTGGGCTGGGCTGGACTGAGCTGGACTGG  
 1 bp Insertion  
 2493 (9/10 bp) OL

376  
 Sμ TGAGCTGGGCTGGGCTGAGCTGGGCTGGGCTGGGCTGAGCGGGTC  
 M1-1 TGAGCTGGGCTGGGCTGAGCTGGGCTGAGCTGGACTGGCCTGGGCTGGGC  
 Sα2 TGGGCTGGGCTGGACTGAGCTGGGCTGAGCTGGACTGGCCTGGGCTGGGC  
 3 bp OL  
 2558 (12/13 bp) OL

184  
 Sμ ATGGGCAAACTGACCTAAGCTGACCTAGACTAAACAAGGCTGAACTGGG  
 M1-2 ATGGGCAAACTGACCTAAGCTGACAGGCTGAGCTGAGCTGGGTTTGGTT  
 Sα1 GGGTGGGCTGAGCTGGGCTGAGCTAGGCTGAGCTGAGCTGGGTTTGGTT  
 0 bp OL  
 2118 (0/0 bp) OL

173  
 Sμ AGAAATGGACTCAGATGGGCAAACTGACCTAAGCTGACCTAGACTAAAC  
 M1-3 AGAAATGGACTCAGATGGGCAAACTGAGCTGGACTGACCTGGGCTAAGC  
 Sα2 TGGGCTGGGCTGAGCTGAGCTGTACTGAGCTGGACTGACCTGGGCTAAGC  
 5 bp OL  
 2308 (7/8 bp) OL

137  
 Sμ AAGGCTGAACTGGGCTGAGCTGAGCTGAACTGGGCTGAGTTGAACTGGG  
 M1-5 AAGGCTGAACTGGGCTGAGCTGCAGCTGAGCTGGGCTGGGCTGGATGAGC  
 Sα2 CTGAGCTGGACTGAGCTGGACTGGCCTGGGCTGGGCTGGGCTGGATGAGC  
 1 bp Insertion  
 2574 (3/4 bp) OL

521  
 Sμ AGCTGAGCTGGGCCGAGCAAGCTAGGCTGAGCTGAGCTGAGCTGGGCTG  
 M1-6 AGCTGAGCTGGGCTGAGCAAGCTAGGCTGGCGGAGCTGAGCTGGGTTG  
 Sα1 TGTTGAGCTGGGCTAGGCTAAGCTAGGCTGAGCTGGGCTGGGTTG  
 9 bp OL  
 2180 (11/12 bp) OL

165  
 Sμ GCTTTCAGAAATGGACTCAGATGGGCAAACTGACCTAAGCTGACCTAGA  
 M1-7 GCTTTCAGAAATGGACTCAGATGGGCTGAGTTGAGCTGTACTGAGCTGGC  
 Sα1 CTGGGCTGGGCTGGGCTGGGCTGAGCTGAGCTGTACTGAGCTGGC  
 2 bp OL  
 2269 (4/5 bp) OL

379  
 Sμ CTGAGCTGGGCTGGGCTGAGCTGGGCTGGGCTGGGCTGGGCTGAGCGGGT  
 M1-8 CTGAGCTGGGCTGGGCTGAGCTGGGCTGGGCTGGGCTGGGCTGAGGTTGGCT  
 Sα1 CTGAGCTGGACTGGGCTGGGCTGGGCTGGGCTGGGCTGGGCTGAGGTTGGCT  
 12 bp OL  
 2521 (15/16 bp) OL

1606  
 Sμ GCTGGGCCGAGCGCAGAGCCAAGCCGAGCTGAGCTTAGCTGGGCTGAGCT  
 M1-9 GCTGGGCCGATCGTAGAGCCAAGCCGAGCTTAGGTTGGACTGAGCTGGGCT  
 Sα2 TGAGCTAGACTGGGCTGAGCTGGGCTGAGCTTAGGTTGGACTGAGCTGGGCT  
 1 bp Insertion  
 2423 (3/4 bp) OL

196  
 Sμ GACCTAAGCTGACCTAGACTAAACAAGGCTGAACTGGGCTGAGCTGAGCT  
 M2-1 GACCTAAGCTGACCTAGACTAAACAAGGCTGGGTTGGGCTGAGCTAGACT  
 Sα1 TGAGCTGGGCTGGGCTGAGCTGGGCTGGGCTGGGTTGGGCTGAGCTAGACT  
 0 bp OL  
 1116 (5/6 bp) OL

420  
 Sμ GCGGGTCTGAGCGGGGCTGAGCTGAGCTGAGCTGGGCTGGGCTGAGCTGG  
 M2-2 GCGGGTCTGAGCGGGGCTGAGCTGAGCTGGGCTGGGCTGGGCTGAGCTGG  
 Sα1 ACTGAGCTGGACTGGGCTGGGCTGAGCTGAGCTGGGCTGGGCTGGGCTGAGCTGG  
 8 bp OL  
 2481 (19/20 bp) OL

182  
 Sμ AGATGGGCAAACTGACCTAAGCTGACCTAGACTAAACAAGGCTGAACTG  
 M2-3 AGATGGGCAAACTGACCTAAGCTGGGCTGGGCTGAGGTTGGGCTAAGGT  
 Sα1 GGGTTGGGCTGAGCTAGACTGGGCTGGGCTGGGCTGAGCTGGGCTAAGCT  
 0 bp OL  
 1146 (0/0 bp) OL



335  
▼

Sμ TGGCTGCACTAAGCTGGGCTGAGCTGGGCAGGGCTGGGCTGAGCTGAGCT  
 M2-4 TGGCTGCACTAAGCTGGGCTGAGCTGGGCTGGGCGGGATGGGCTGAGGTG  
 Sα1 GGACTGAGCTGGACTGGCCTGGCTGGGCTGGGCGGGATGGGCTGAGGTG  
 ▲ 2521 7 bp OL  
 (11/12 bp) OL

334  
▼

Sμ GGCTTGGCTGCACTAAGCTGGGCTGAGCTGGGCAAGGGCTGGGCTGAGCTG  
 M2-6 GGCTTGGCTGCACTAAGCTGGGCTGAGCTGGGCTGGGCTGGACTGAGCTG  
 Sα1 GACTGAGCTGGACTGGCCTGGGCTGAGCTGGGCTGGGCTGGACTGAGCTG  
 ▲ 2477 16 bp OL  
 (23/24 bp) OL

219  
▼

Sμ CAAGGCTGAACTGGGCTGAGCTGAGCTGAACTGGGCTGAGTTGAACTGGG  
 M2-9 CAAGGCTGAACTGGGCTGAGCTGAGGTGAACTGGGCTGACTGGGCTGGA  
 Sα1 GCGGGGTGAGCTGGGTTGGGCTGAGCTGAACTGGGCTGACTGGGCTGGA  
 ▲ 2216 1 bp Insertion  
 (12/13 bp) OL

337  
▼

Sμ CACTAAGCTGGGCTGAGCTGGGCAAGGCTGGGCTGAGCTGAGCTGGGCTG  
 M2-10 CACTAAGCTGGGCTGAGCTGGGCAAGGCTGGGCTGAGCTGGGCTGGGCTG  
 Sα1 GACTGGGCGGGACTGAGCTGGACTGGCTGGGCTGAGCTGGGCTGGGCTG  
 ▲ 2450 2 bp OL  
 (15/16 bp) OL
